# Supplementary material for: MicroRNA regulatory pathway analysis identifies miR-142-5p as a negative regulator of TGF-β pathway via targeting SMAD3
Source: PubMed Central journal article supplement (PMC5342096; doi:10.18632/oncotarget.12229), 2016-09-24
Supplement: oncotarget-07-71504-s001.pdf [file oncotarget-07-71504-s001.pdf]

## MicroRNA regulatory pathway analysis identifies miR-142-5p as a negative regulator of TGF- $\beta$ pathway via targeting SMAD3

### Supplementary Materials

**Supplementary Table S1: miRNA pathway regulation numbers in each tumor types**

| Tumor type | 20 tumor with both case and normal samples miR-pathway numbers |
|------------|----------------------------------------------------------------|
| BLCA       | 2781                                                           |
| BRCA       | 1112                                                           |
| CESC       | 2240                                                           |
| CHOL       | 1005                                                           |
| ESCA       | 742                                                            |
| HNSC       | 759                                                            |
| KICH       | 540                                                            |
| KIRC       | 545                                                            |
| KIRP       | 530                                                            |
| LIHC       | 952                                                            |
| LUAD       | 999                                                            |
| LUSC       | 926                                                            |
| PAAD       | 708                                                            |
| PCPG       | 1486                                                           |
| PRAD       | 677                                                            |
| SKCM       | 1719                                                           |
| STAD       | 818                                                            |
| THCA       | 613                                                            |
| THYM       | 971                                                            |
| UCEC       | 2219                                                           |

**Supplementary Table S2: One tail fisher's exact test analysis**

|                     | In Pathway N | Not in Pathway N | Total |
|---------------------|--------------|------------------|-------|
| In M target set     | a+           | a-               | a     |
| Not in M target set | b+           | b-               | b     |
| Total               | c+           | c-               | c     |

a: number of miRNA M targeted nodes. b: number of miRNA M non-targeted nodes. c+: number of nodes in pathway N. c-: number of nodes not in pathway N. a+: number of targeted nodes in pathway N. a-: number of target nodes not in pathway N. b+: number of non-targeted nodes in pathway N. b-: number of non-targeted nodes not in pathway N. c: all nodes.

**Supplementary Table S3: The primers for amplification of specific cDNAs**

| Predicted targets | Chain   | PCR primers                             | Product size (bp) |
|-------------------|---------|-----------------------------------------|-------------------|
| SMAD3             | Forward | cacaactcgagCAGCTCTCTGACGCTTGTGACAGTG    | 1463              |
|                   | Reverse | aagcggccgcAGGCACATACTTCAGACTCACAGCAT    |                   |
| TGFB1             | Forward | cacaactcgagGGAGGTCAATTGTTCTACCTCACTGAGA | 2536              |
|                   | Reverse | aagcggccgcTAGGATGGGCAGTATAAACAACACTGTG  |                   |
| TGFB2             | Forward | cacaactcgagCCAAAGAACAGAGGCAGCAGGAA      | 1563              |
|                   | Reverse | aagcggccgcGTAAAGCACTCCTCTCTCCAATGCAGA   |                   |
| TGFB2             | Forward | cacaactcgagCCTTCCCATTCTTACTCTT          | 1050              |
|                   | Reverse | aagcggccgcGAACCCTAAATCCTTGCT            |                   |

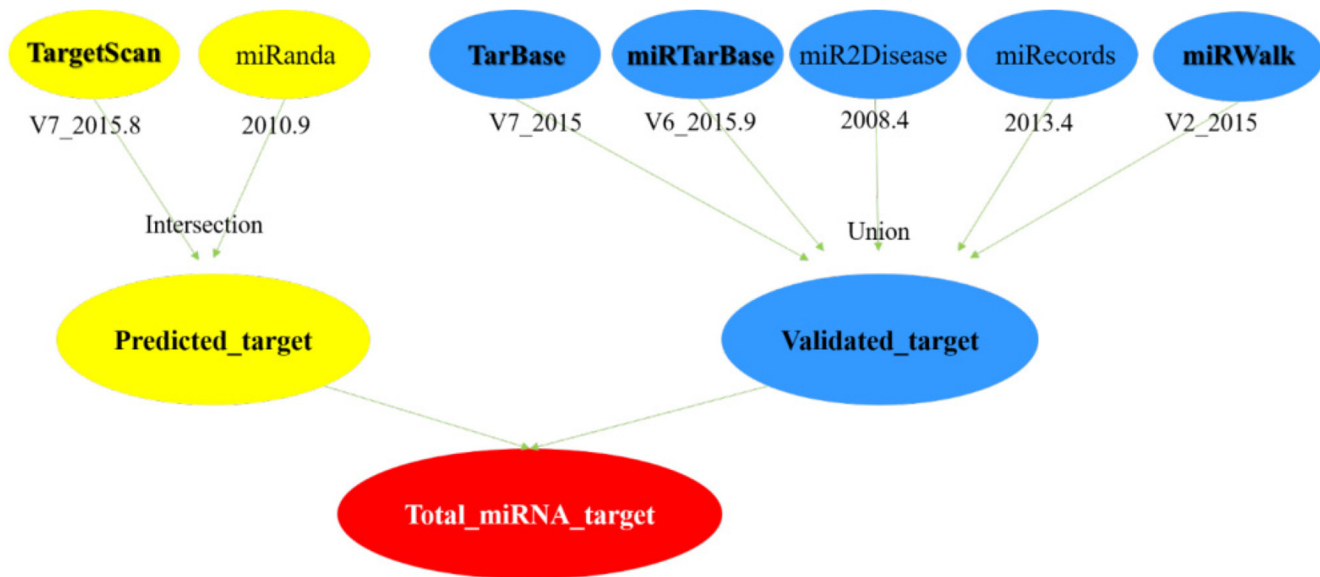

**Supplementary Figure S1: MiRNA data source and process.** we compiled seven online databases (TargetScan, miRanda, TarBase, miR2Disease, miRTarBase, miRecords, miRWalk) with predicted targets or experimentally validated targets of miRNAs. We intersected predicted miRNA targets from TargetScan and miRanda, and unioned verified miRNA targets from TarBase, miRTarBase, miR2Disease, miRecords, miRwalk to get the final miRNA-target result.

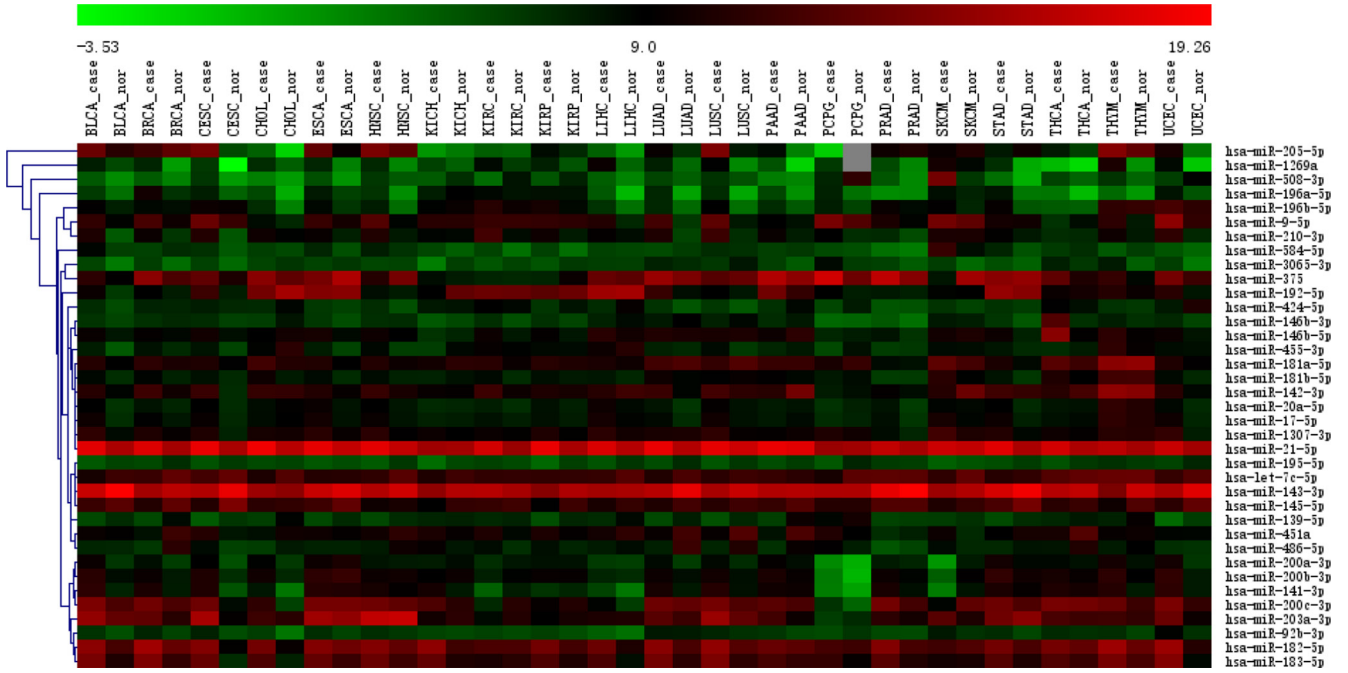

**Supplementary Figure S2: Heatmap of 37 miRNAs expressed differently more than 10 tumor types.** Expression of these miRNAs transformed to log<sub>2</sub> RSEM.

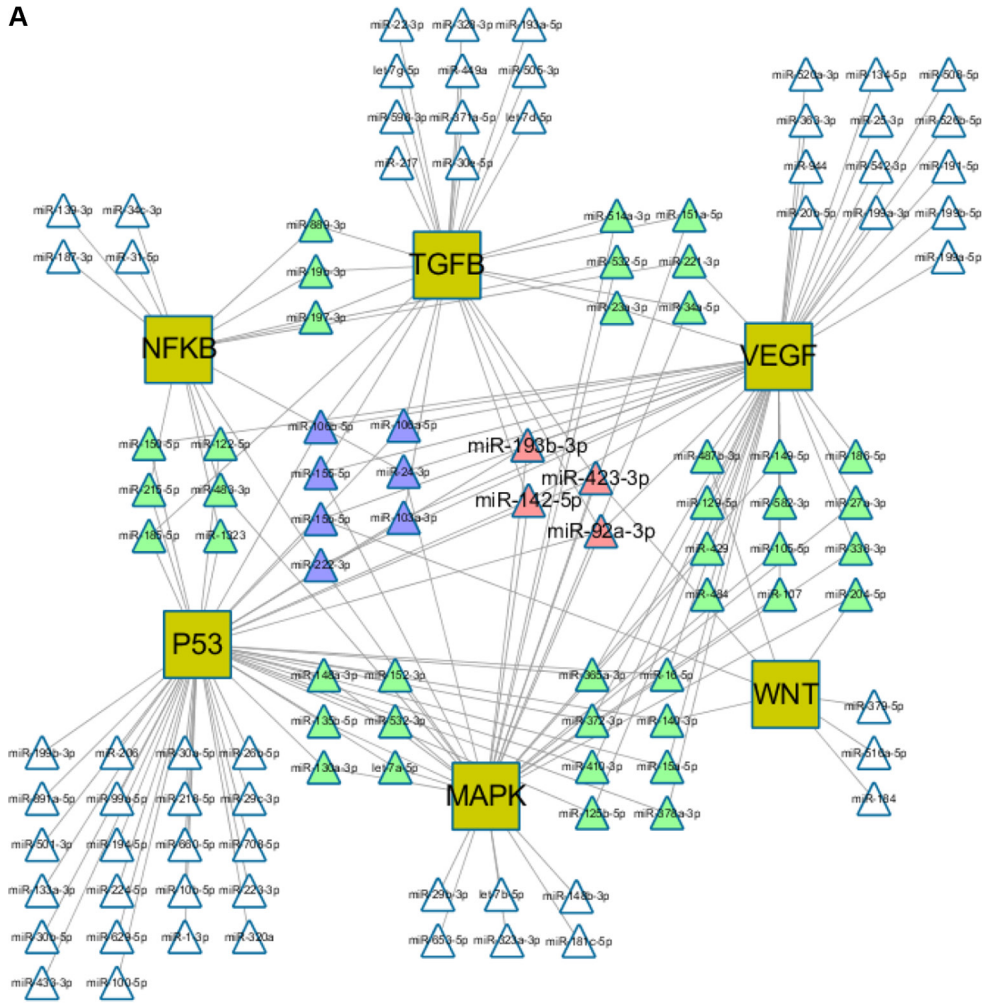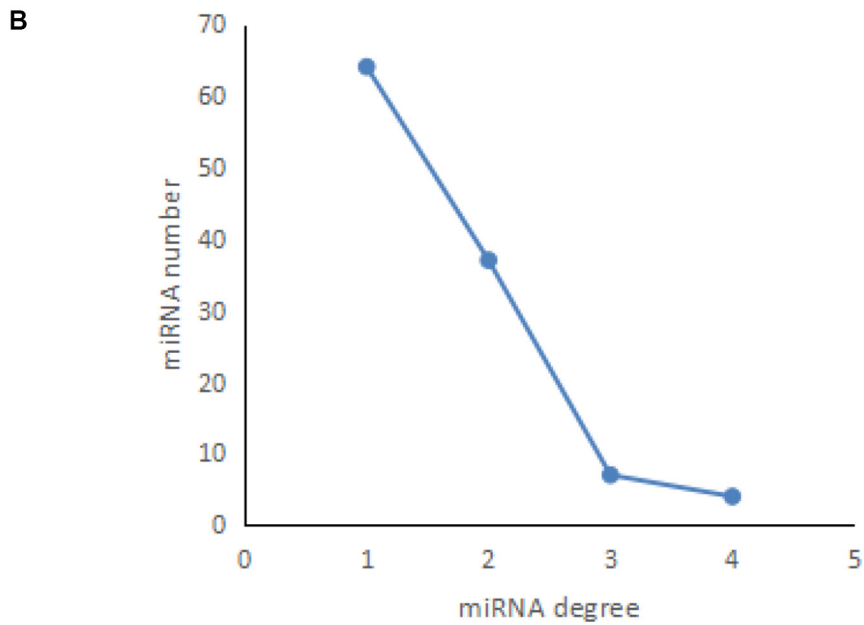

**Supplementary Figure S3:** (A) The network of six cancer related pathways regulated by miRNAs that differentially expressed in less than 10 tumor types. The white, green, blue and red triangles were miRNAs that regulated one, two, three and four pathways, respectively. (B) Statistics of miRNA degree in miRNA pathway networks.

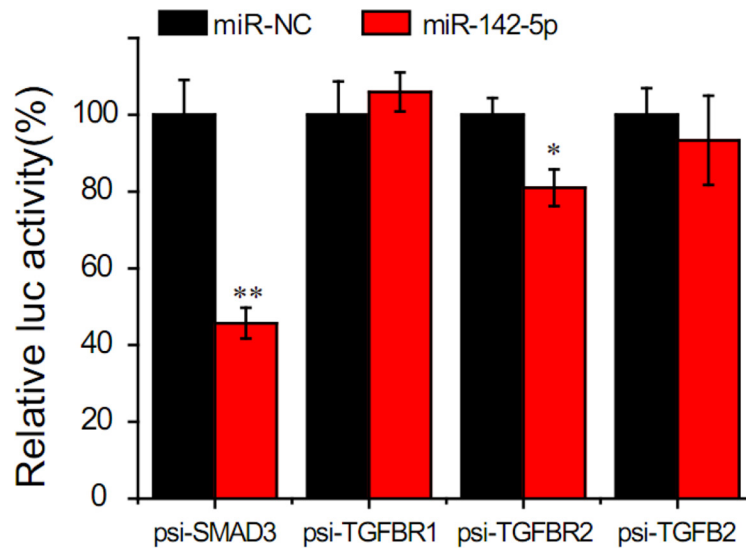

**Supplementary Figure S4: The luminescence intensities of predicted targets in the TGF- $\beta$  pathway.** Firefly and Renilla luciferase activities were measured as described in materials and methods.

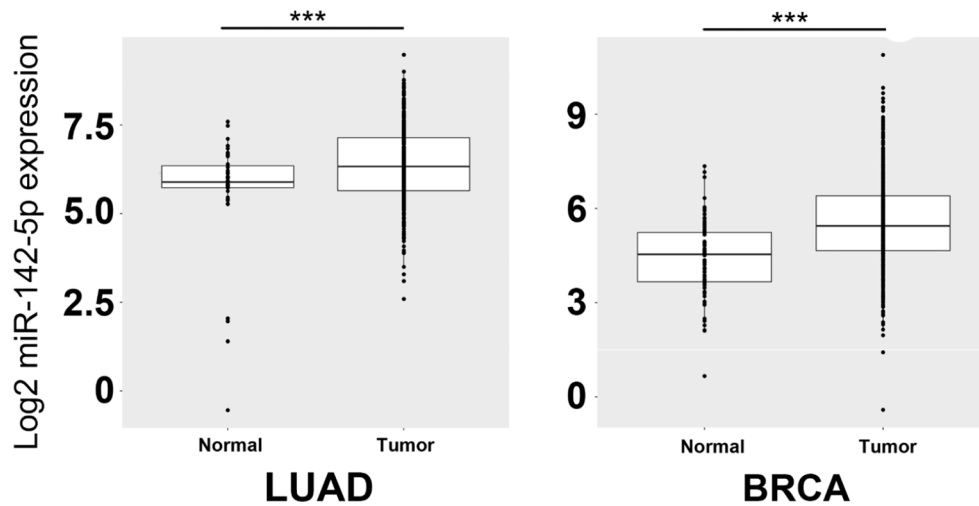

**Supplementary Figure S5: Expression of miR-142-5p was up-regulated in LUAD (A) and BRCA (B) tissues compared to normal tissues in TCGA.** \*\*\* $P < 0.001$ . LUAD: Lung adenocarcinoma, BRCA: Breast invasive carcinoma.

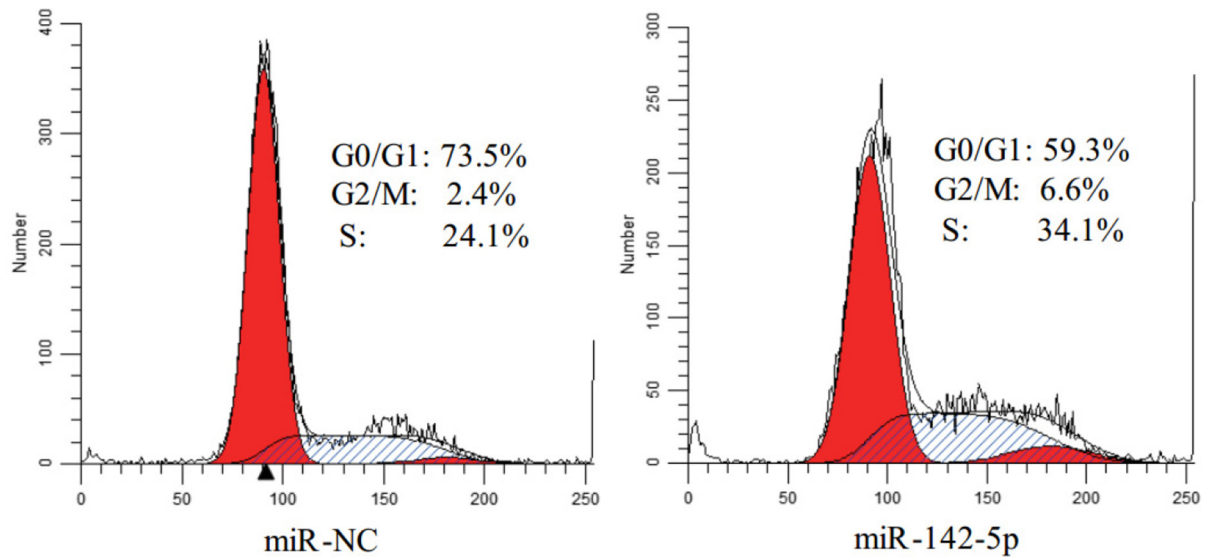

**Supplementary Figure S6: miR-142-5p overexpression promotes cell cycle progression in Hela cells.** miR-142-5p mimics and control RNAs were transfected into Hela cells. 24 h later, cell cycle distribution was studied by flow cytometry as described in materials and methods.

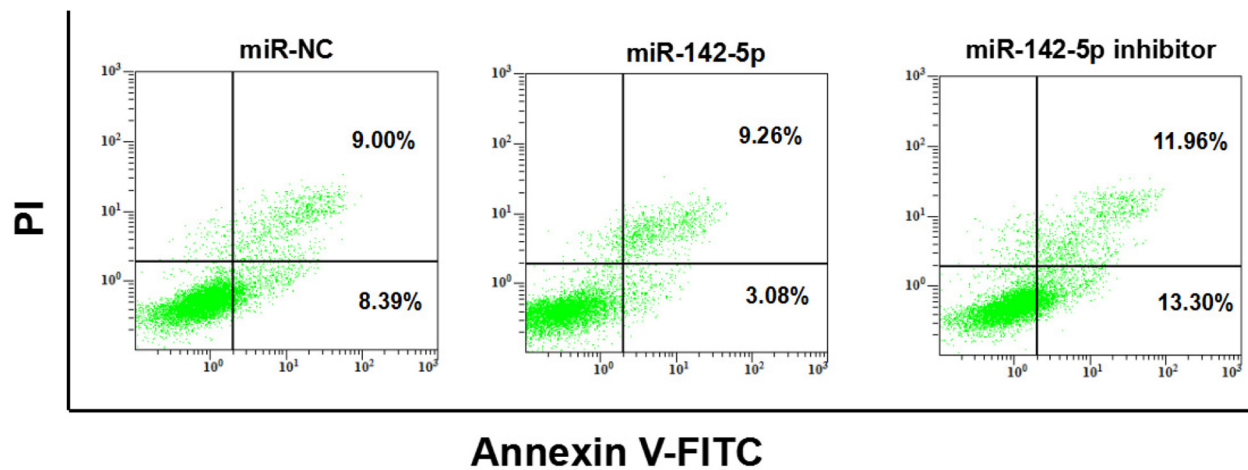

**Supplementary Figure S7: Ectopic expression of miR-142-5p attenuates cell apoptosis.** The MDA-MB-231 cells were transfected with miR-142-5p/inhibitor/miR-NC 48h later, apoptosis cells were stained with Annexin V-FITC/PI and analyzed. The percentage at the upper right (UR) area and lower right (LR) area stands for the total apoptosis (UR + LR).
